# Supplementary material for: Physical insights from the Frumkin isotherm applied to electrolyte gated organic transistors as protein biosensors
Source: Royal Society of Chemistry journal article supplement (doi:10.1039/d1tc02546e), 2021-01-01
Supplement: d1tc02546e1.pdf [file d1tc02546e1.pdf]

Supporting Information for:

## Physical Insights from Frumkin Isotherm Applied to Electrolyte Gated Organic Transistor as Protein Biosensors.

Pamela Allison Manco Urbina,<sup>a</sup> Marcello Berto,<sup>a</sup> Pierpaolo Greco,<sup>a</sup> Matteo Sensi,<sup>a</sup> Simone Borghi,<sup>a</sup> Marco Borsari,<sup>b</sup> Carlo Augusto Bortolotti\*<sup>a</sup> and Fabio Biscarini\*<sup>a,c</sup>

- Department of Life Sciences, University of Modena and Reggio Emilia, via Campi 103, 41125 Modena, Italy
- Department of Chemical and Geological Sciences, University of Modena and Reggio Emilia, via Campi 103, 41125 Modena, Italy
- Italian Institute of Technology — Center for Translational Neurophysiology, Via Fossato di Mortara 17-19, 44121 Ferrara, Italy

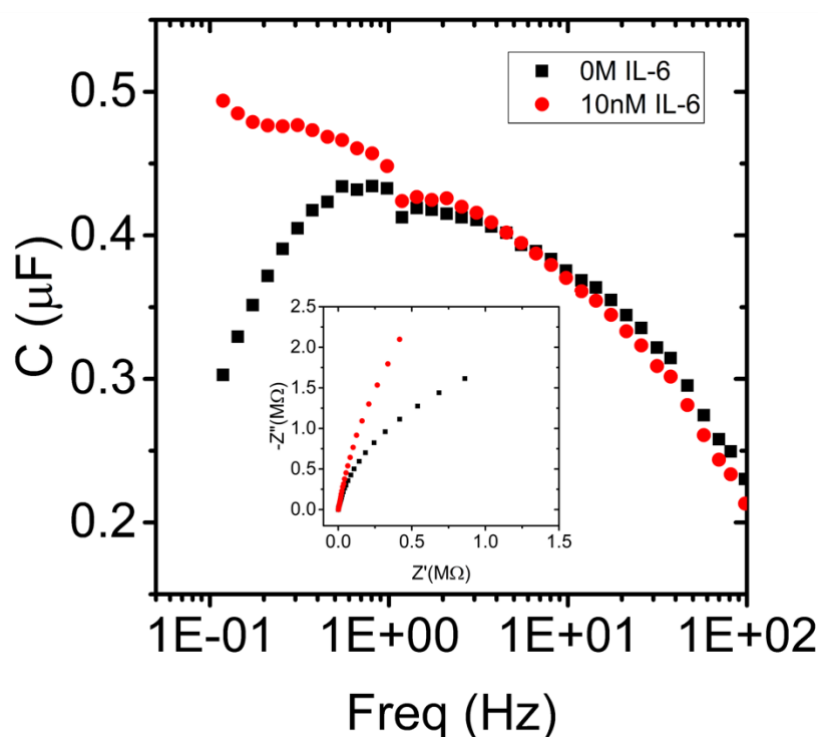

**Figure S1.** Complex capacitance<sup>1</sup> of the gate electrode, at 0 M (black) and 10 nM IL-6 (red), determined by non-faradic electrochemical impedance spectroscopy. In the inset the relative Nyquist plot. The measurements were performed in 10 mM PBS pH 7.4, applying a potential of +100mV vs Pt electrode, with an amplitude of 5 mV.

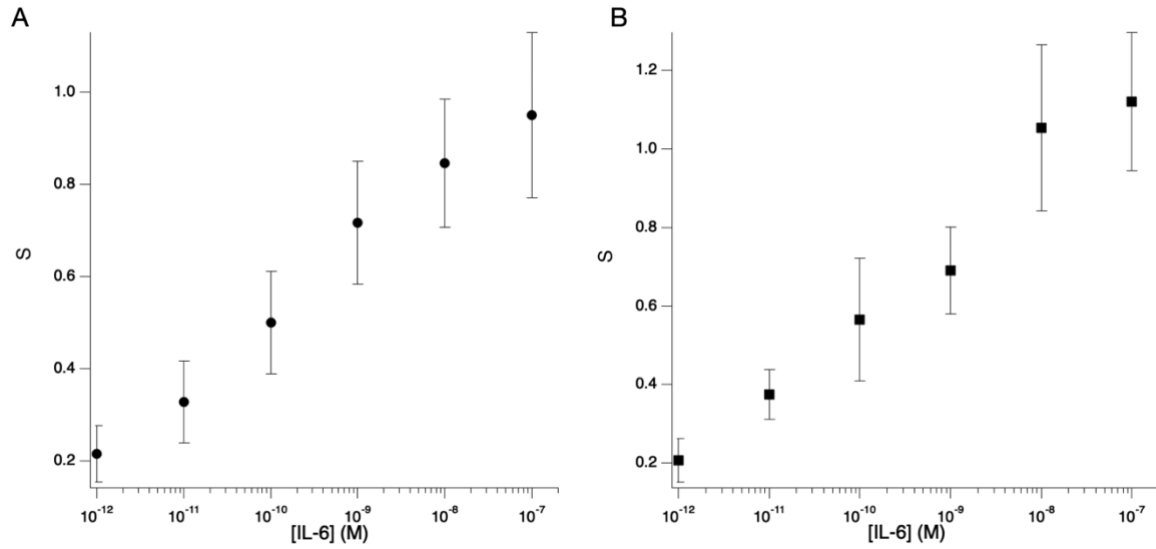

**Figure S2.** Dose curves  $S$  vs [IL-6] for OECT (A) and EGOFET (B) at  $V_{GS} = +0.3V$  and  $V_{GS} = -0.3V$ , respectively. The experimental values are the average of the measurements performed for five ( $n=5$ ) OECT and  $n=5$  EGOFET devices, except for [IL-6] = 100 nM for EGOFET for which  $n=4$ . Error bars represent the associated standard error.

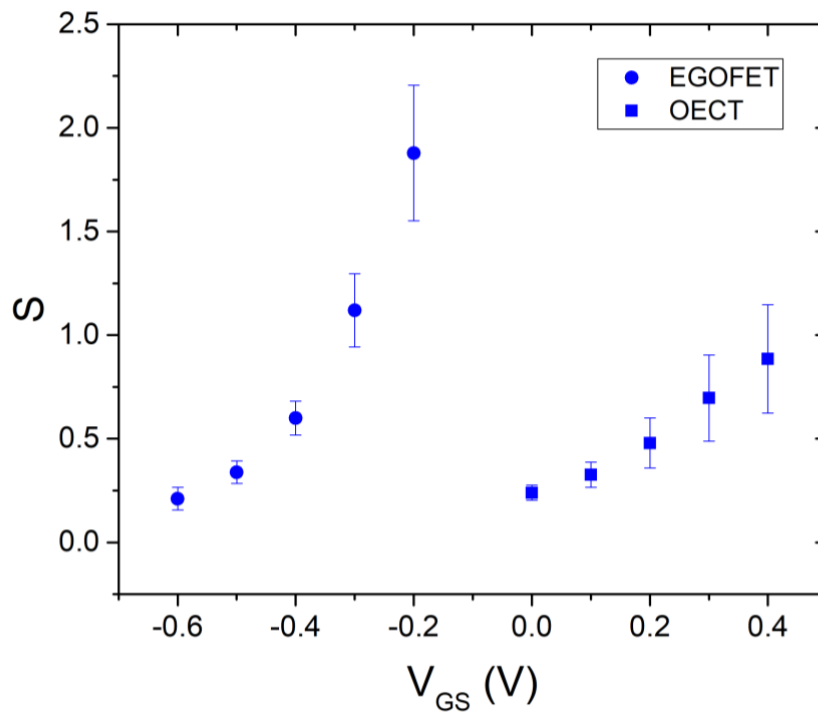

**Figure S3.** Dependence of  $S$  (blue squares and blue circles for OECT and EGOFET, respectively) vs  $V_{GS}$ . Error bars represent the associated standard error of the mean (SEM).

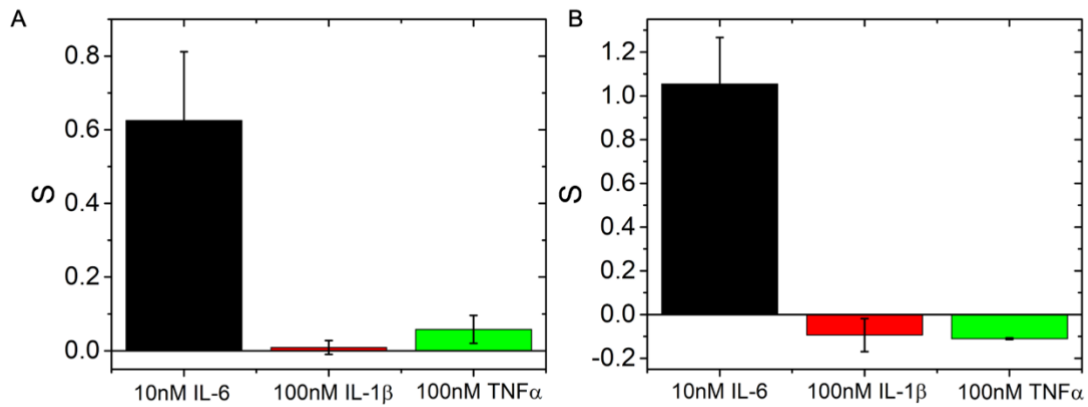

**Figure S4.** Control experiments: comparison of the signal  $S$  for OECT (A) and EGOFET (B) after exposing gate electrodes functionalized with anti-IL-6 antibodies to 10nM IL-6 (black) and high concentration (100 nM) of IL-1 $\beta$  (red) and TNF $\alpha$  (green).

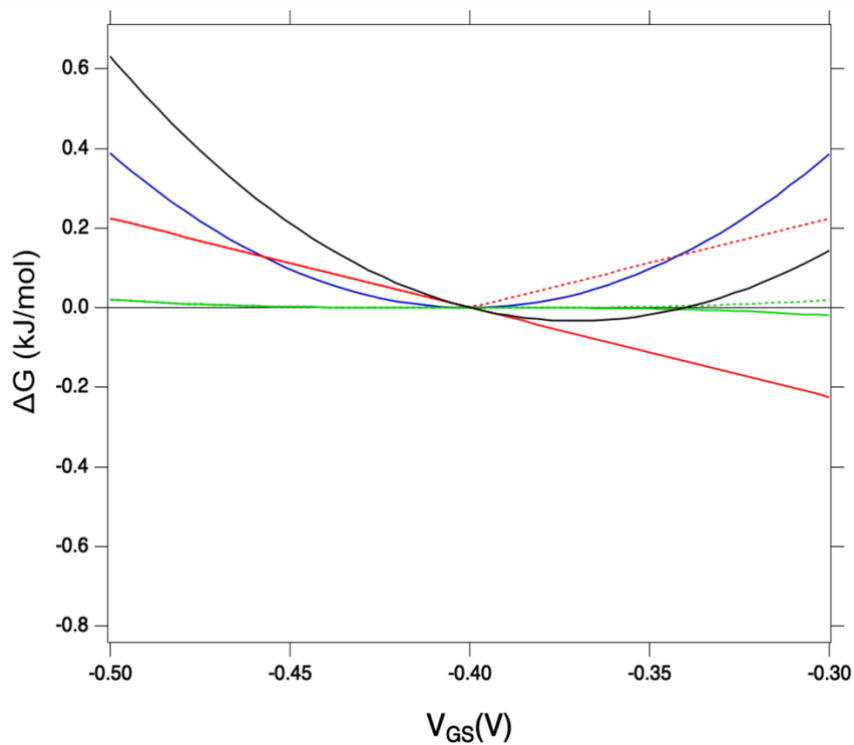

**Figure S5.** Contributions to the total (black line) electrostatic free energy: charge contribution (continuous red line, dotted red line is the corresponding absolute value); capacitance contribution (continuous blue line) and change in capacitance  $dC/dV_{GS}$  (continuous green line, dotted green line is the corresponding absolute value).

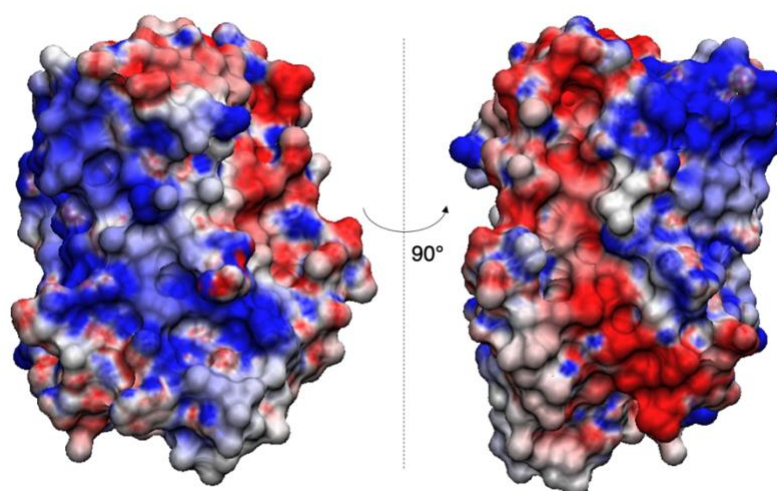

**Figure S6.** Calculated electrostatic potential for IL-6 mapped on its molecular surfaces. Potential values lower than  $-5$  kT/e are colored in red, potential values higher than  $+5$  kT/e are depicted in blue. The electrostatic properties were investigated using the APBS software. The pqr input file required to run APBS was prepared using PDB2PQR (43). The electrostatic potential was obtained by solving the linearised Poisson–Boltzmann equation at 298.5 K, using dielectric constant values of 2 and 78.54 for protein (solute) and solvent, respectively.

#### References

1. Ibañeta, C. *et al.* Immunosensing prostate-specific antigen: Faradaic vs non-Faradaic electrochemical impedance spectroscopy analysis on interdigitated microelectrode device. *Int. J. Biol. Macromol.* **162**, 1924–1936 (2020).
